# Supplementary material
Source: Research Square preprint supplement (doi:10.21203/rs.3.rs-9553139/v1)
Supplement: Supplementary file 1 [file 47efa4790ef8a255f6933350.docx]

**Table S1**

| Construct | Instrument | Included items |
| --- | --- | --- |
| Eating-related behaviours (ED) | Eating Attitudes Test (EAT) | ED1, ED2, ED3, ED4, ED5, ED6, ED7, ED8, ED9, ED10, ED11, ED12 |
| Social anxiety symptoms – Fear | Liebowitz Social Anxiety Scale | SA_FE1, SA_FE3, SA_FE4, SA_FE6, SA_FE7, SA_FE9, SA_FE10, SA_FE12, SA_FE15, SA_FE17, SA_FE18, SA_FE19, SA_FE20 |
| Social anxiety symptoms – Avoidance | Liebowitz Social Anxiety Scale | SA_AV2, SA_AV3, SA_AV4, SA_AV5, SA_AV7, SA_AV8, SA_AV9, SA_AV11, SA_AV12, SA_AV13, SA_AV16 |
| Concern over mistakes (COM) | Frost’s Multidimensional Perfectionism Scale – Concern Over Mistakes subscale | P9_COM, P12_COM, P13_COM, P14_COM |

***Note.*** ED (items from the EAT questionnaire assessing eating-related behaviours); SA (items assessing social anxiety symptoms, where SA_FE refers to social fear items and SA_AV refers to social avoidance items); COM (items from the perfectionism questionnaire assessing concern over mistakes). All items were modelled as reflective indicators with significant standardised loadings (*p* < .001).
